# Supplementary material for: Synthesis, and optical and electrochemical properties of 1,1′,3,3′-tetraaryl-4,4′-bibenzo[c]thiophene derivatives with the same or different aryl substituents on the thiophene rings
Source: Royal Society of Chemistry journal article supplement (doi:10.1039/d4nj01350f), 2024-01-01
Supplement: d4nj01350f1.pdf [file d4nj01350f1.pdf]

## Supplementary Information

### **Synthesis, optical and electrochemical properties of 1,1',3,3'-tetraaryl-4,4'-bibenzo[*c*]thiophene derivatives with same or different aryl substituents on the thiophene rings**

Yasuto Hara,<sup>a</sup> Kumpei Kozuka,<sup>a</sup> Keiichi Imato,<sup>a</sup> Seiji Akiyama,<sup>b</sup> Mio Ishida<sup>b</sup> and  
Yousuke Ooyama<sup>\*a</sup>

<sup>a</sup>*Department of Applied Chemistry, Graduate School of Engineering, Hiroshima University,  
1-4-1 Kagamiyama, Higashi-Hiroshima 739-8527, Japan. E-mail:  
yooyama@hiroshima-u.ac.jp; Fax: (+81) 82-424-5494*

<sup>b</sup>*Science & Innovation Center, Mitsubishi Chemical Corporation, 1000 Kamoshida-cho,  
Aoba-ku, Yokohama-shi, Kanagawa 227-8502, Japan*

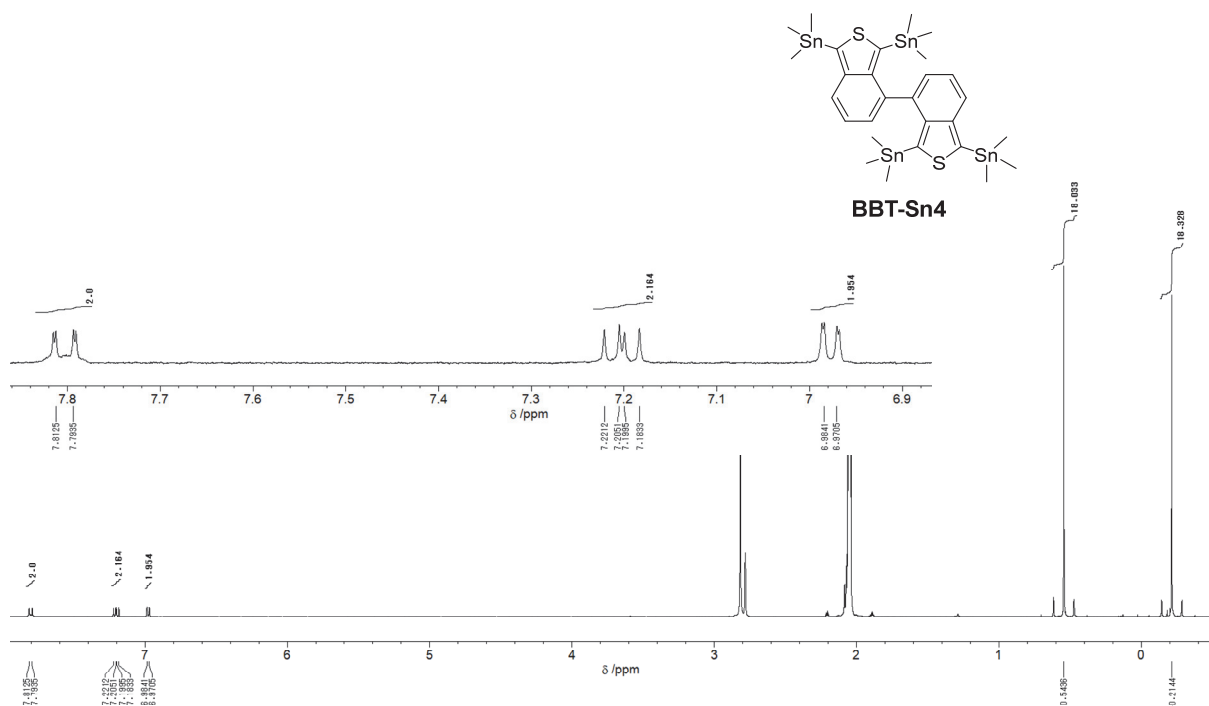

**Fig. S1**  $^1\text{H}$  NMR (400 MHz) spectrum of **BBT-Sn4** in acetone- $d_6$  at 23 °C.

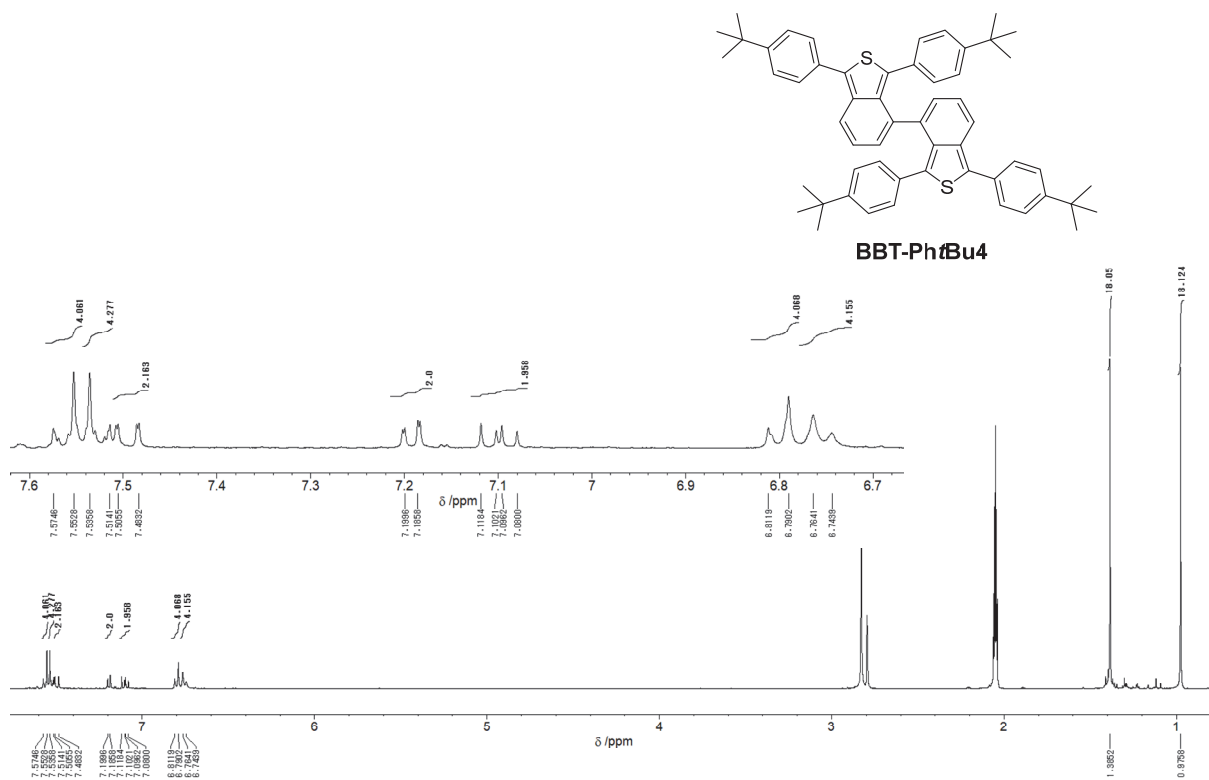

**Fig. S2**  $^1\text{H}$  NMR (400 MHz) spectrum of **BBT-Ph4Bu4** in acetone- $d_6$  at 23 °C.

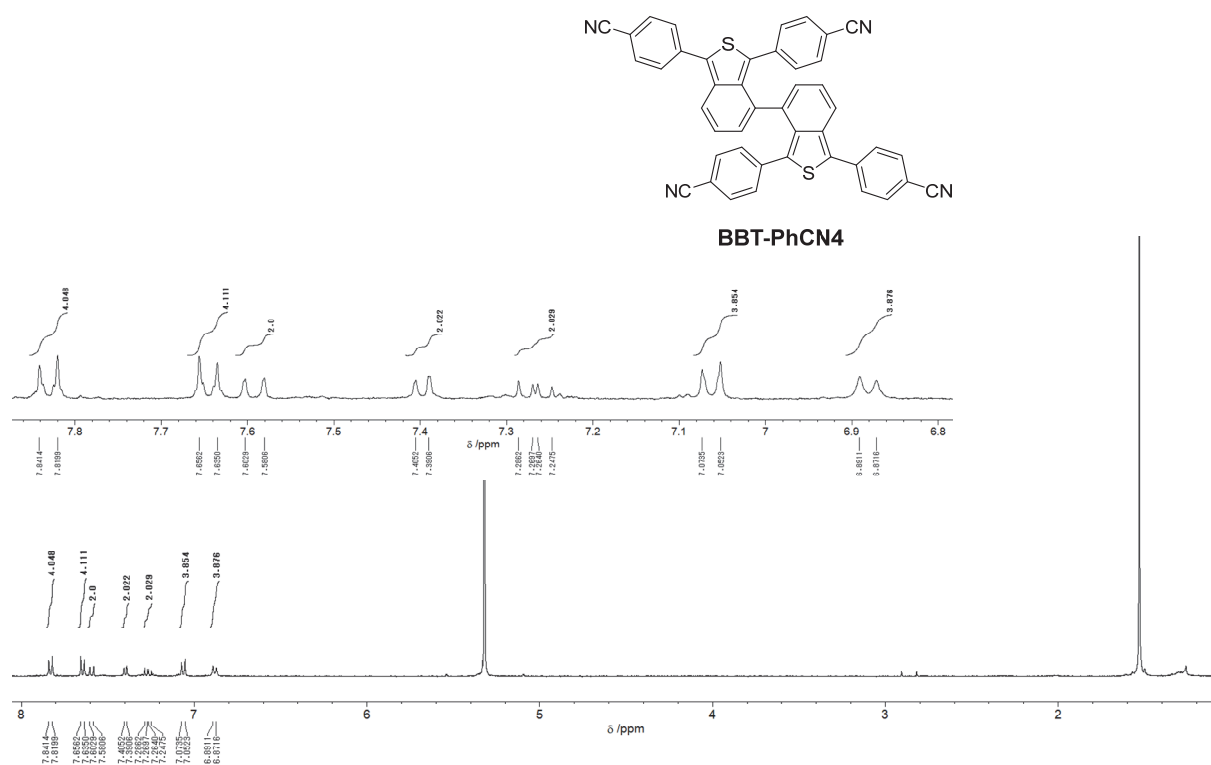

**Fig. S3**  $^1\text{H}$  NMR (400 MHz) spectrum of **BBT-PhCN4** in dichloromethane- $d_2$  at 23 °C.

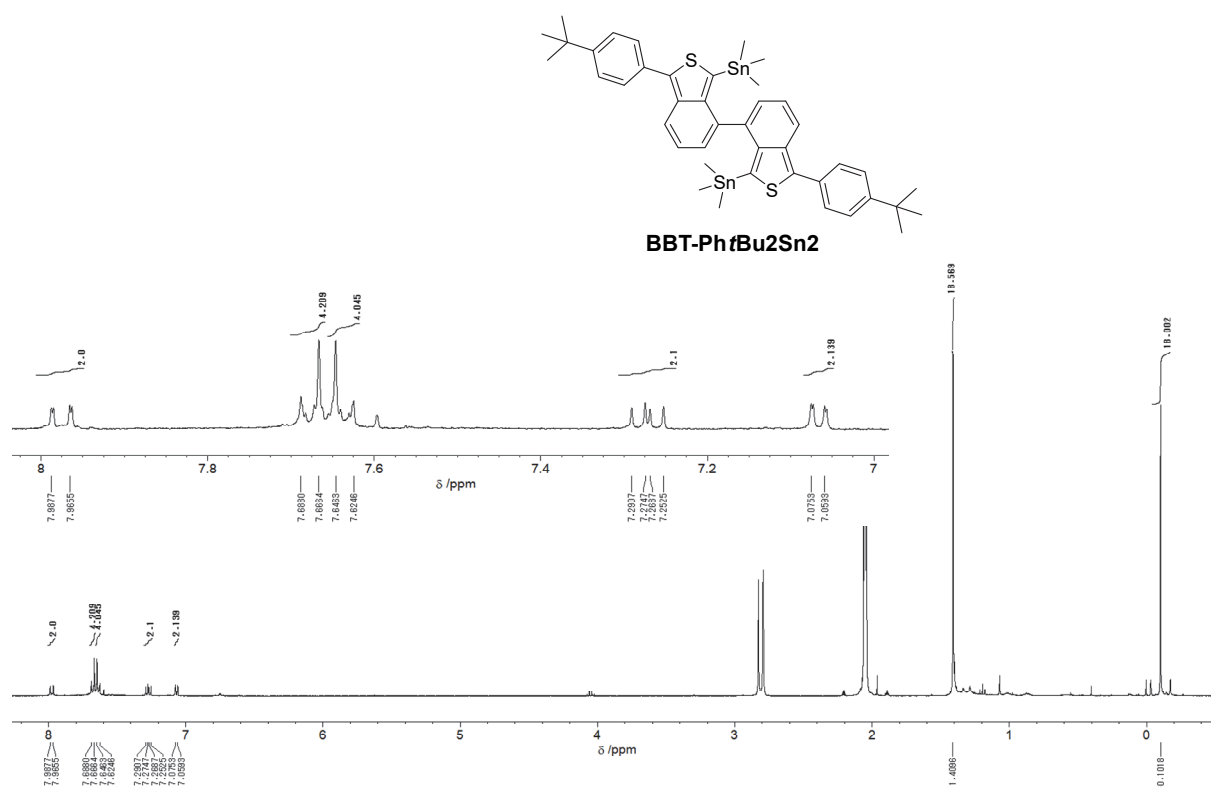

**Fig. S4**  $^1\text{H}$  NMR (400 MHz) spectrum of **BBT-Ph-tBu2Sn2** in acetone- $d_6$  at 23 °C.

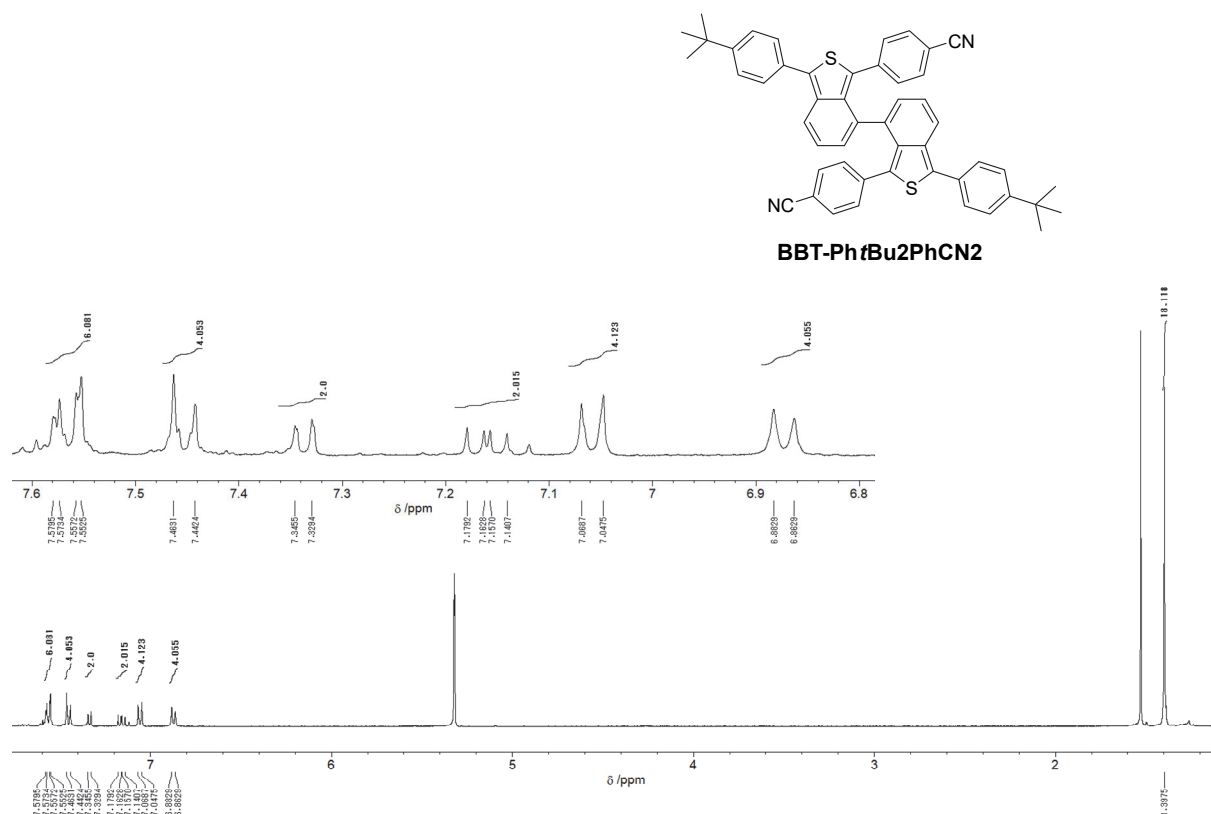

Fig. S5  $^1\text{H}$  NMR (400 MHz) spectrum of **BBT-PhfBu2PhCN2** in dichloromethane- $d_2$  at 23 °C.

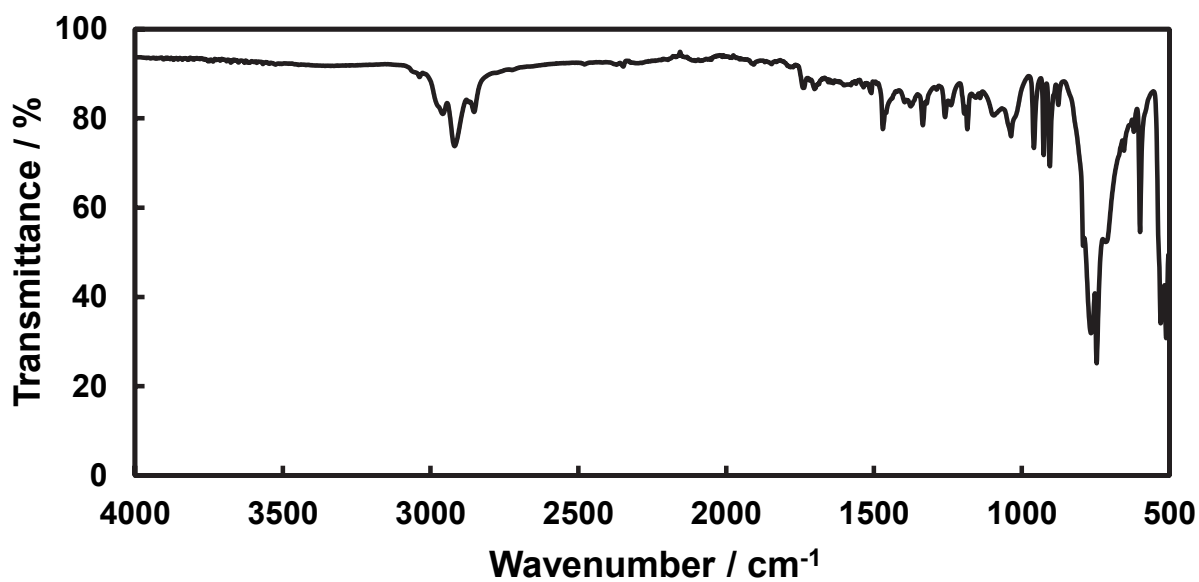

Fig. S6 FTIR spectrum of **BBT-Sn4**.

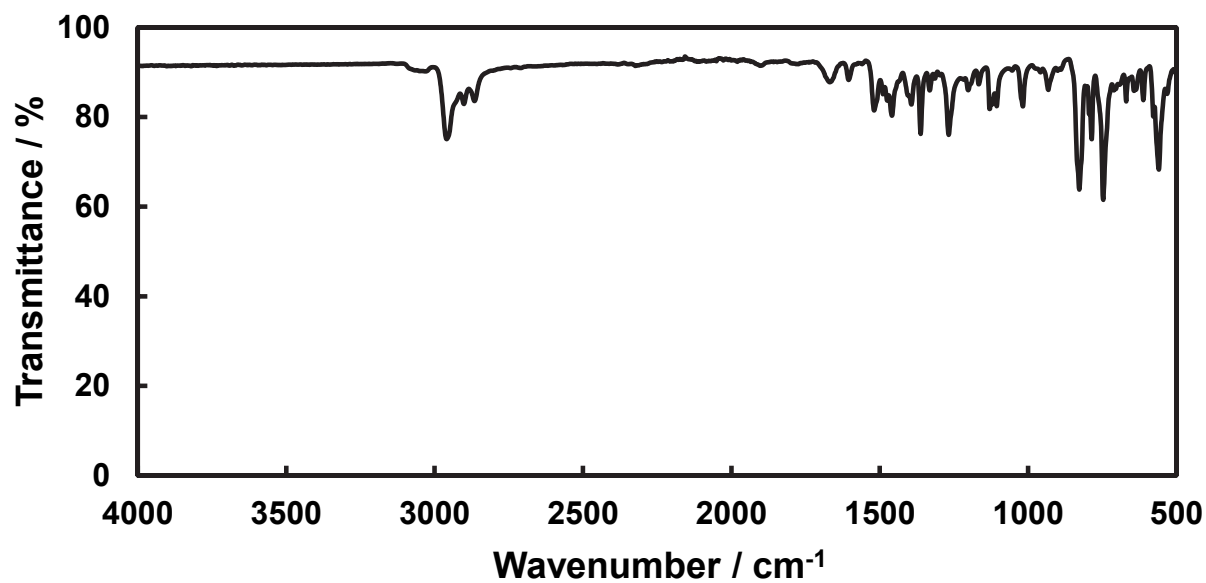

Fig. S7 FTIR spectrum of **BBT-Ph/Bu4**.

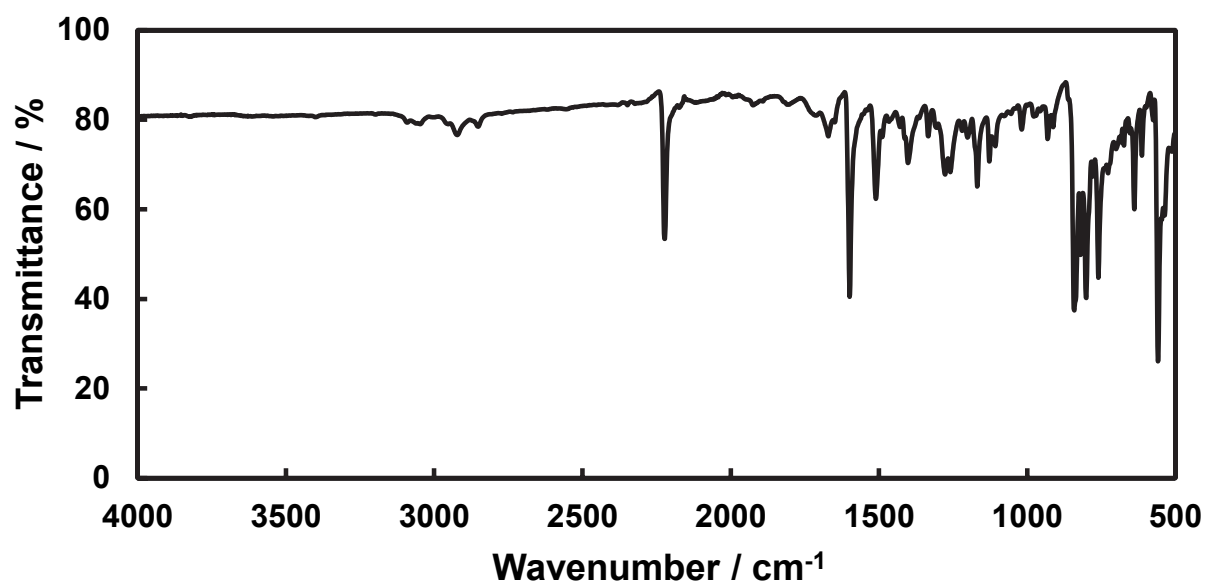

Fig. S8 FTIR spectrum of **BBT-PhCN4**.

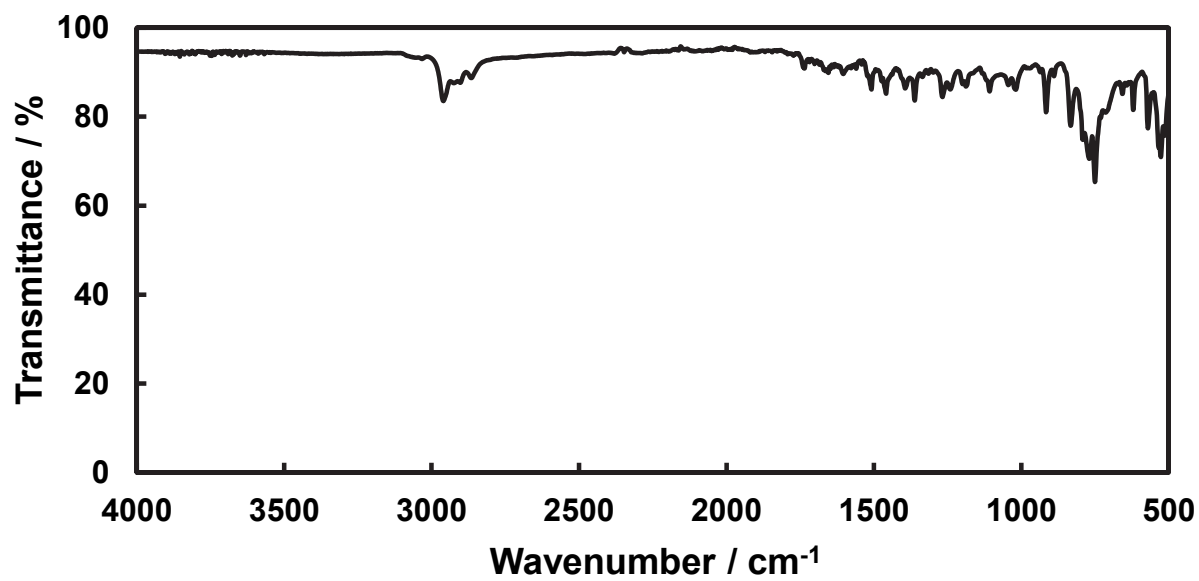

Fig. S9 FTIR spectrum of BBT-Phz/Bu<sub>2</sub>Sn<sub>2</sub>.

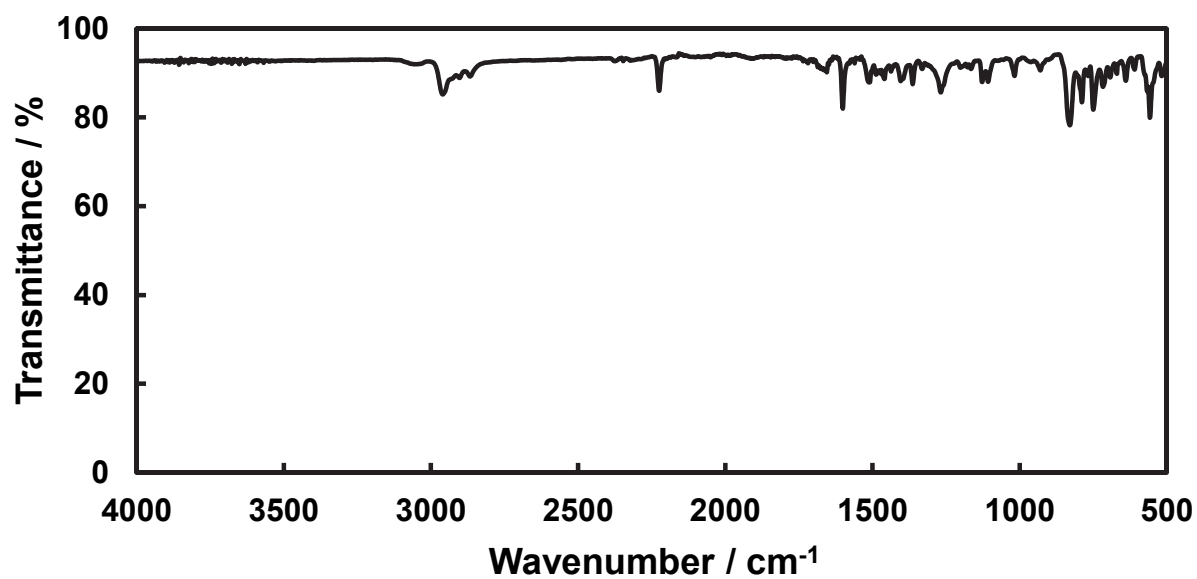

Fig. S10 FTIR spectrum of BBT-Phz/Bu<sub>2</sub>PhCN<sub>2</sub>.

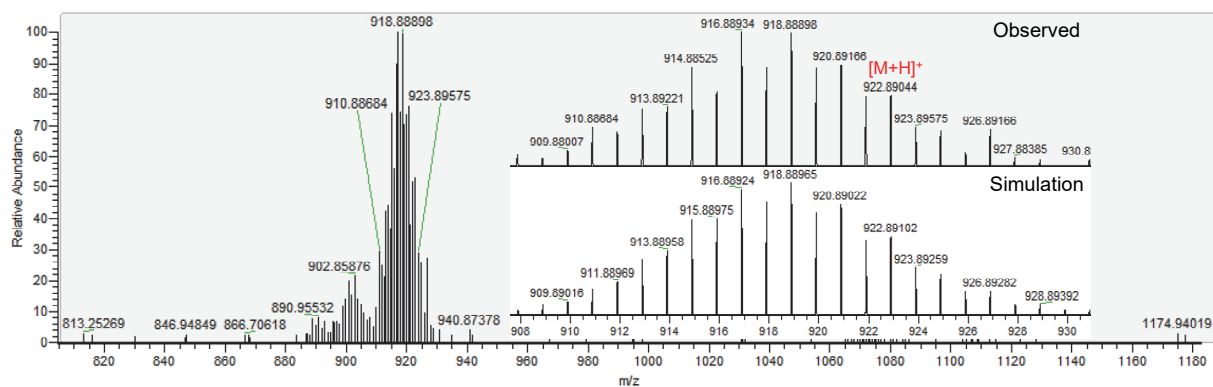

**Fig. S11** HRMS (APCI) of BBT-Sn4.

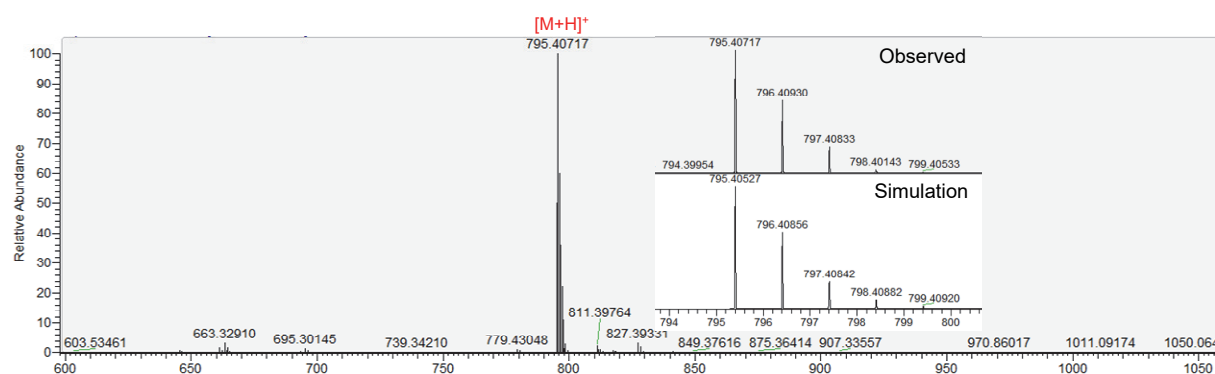

**Fig. S12** HRMS (APCI) of BBT-PhrBu4.

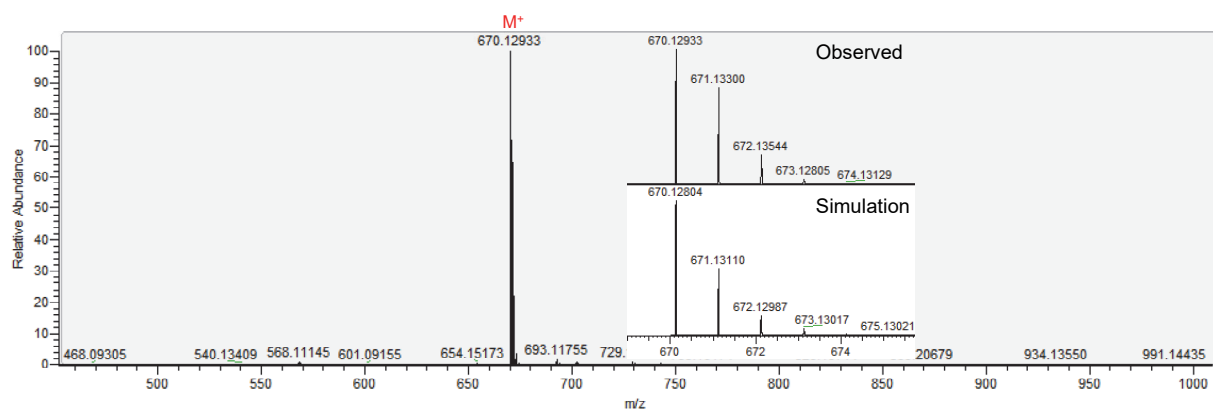

**Fig. S13** HRMS (APCI) of BBT-PhCN4.

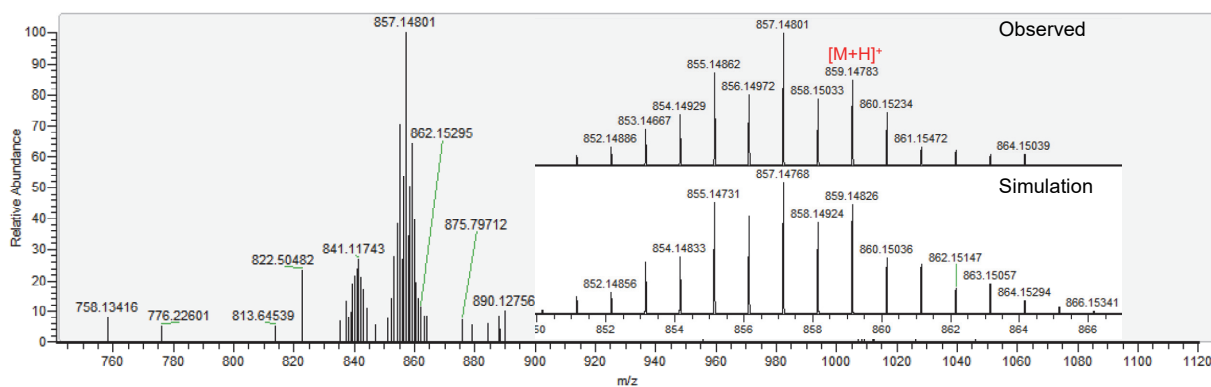

**Fig. S14** HRMS (APCI) of **BBT-PhrBu<sub>2</sub>Sn<sub>2</sub>**.

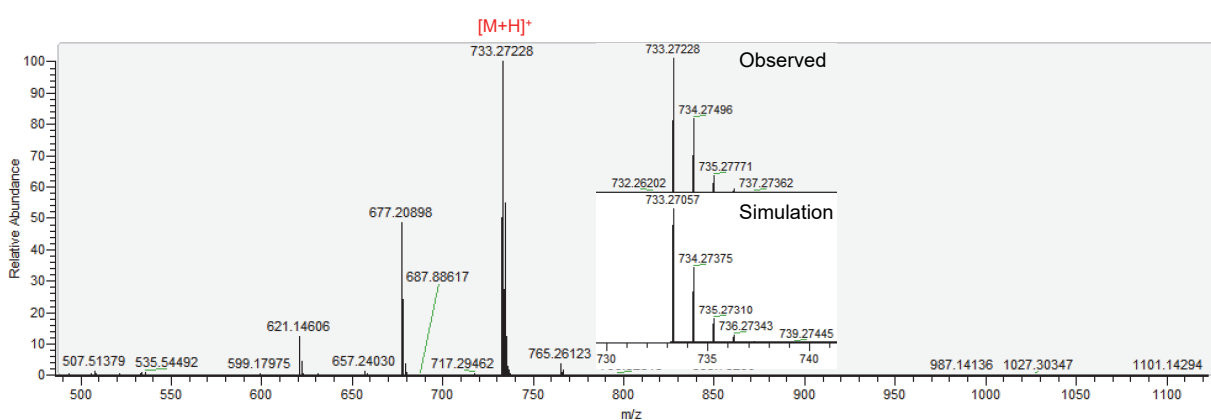

**Fig. S15** HRMS (APCI) of **BBT-PhrBu<sub>2</sub>PhCN<sub>2</sub>**.

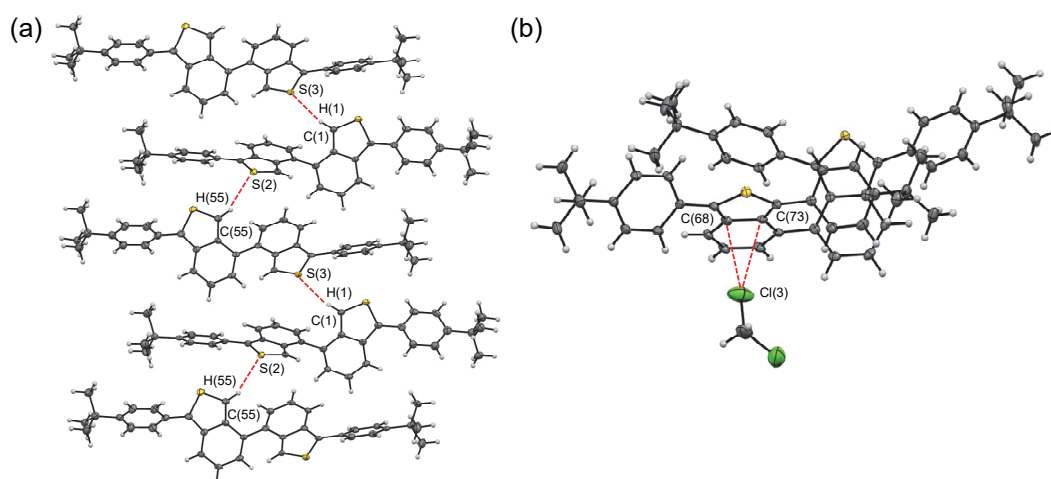

**Fig. S16** (a) Intermolecular CH...S hydrogen bonding interactions ( $C(1)H(1)\cdots S(3)$  angle =  $162.85^\circ$ ,  $C(1)\cdots S(3)$  distance =  $3.833 \text{ \AA}$ ,  $H(1)\cdots S(3)$  distance =  $2.915 \text{ \AA}$  and  $C(55)H(55)\cdots S(2)$  angle =  $153.77^\circ$ ,  $C(55)\cdots S(2)$  distance =  $3.668 \text{ \AA}$ ,  $H(55)\cdots S(2)$  distance =  $2.792 \text{ \AA}$ ) in the crystal structure of **BBT-PhrBu<sub>2</sub>** and (b) the short interatomic contacts ( $C(68)\cdots Cl(3)$  distance =  $3.362 \text{ \AA}$  and  $C(73)\cdots Cl(3)$  distance =  $3.397 \text{ \AA}$ ) between the carbon atom of benzo[*c*]thiophene unit and the chlorine atom of  $CH_2Cl_2$  were observed in the crystal structure of in the crystal structure of **BBT-PhrBu<sub>4</sub>**.



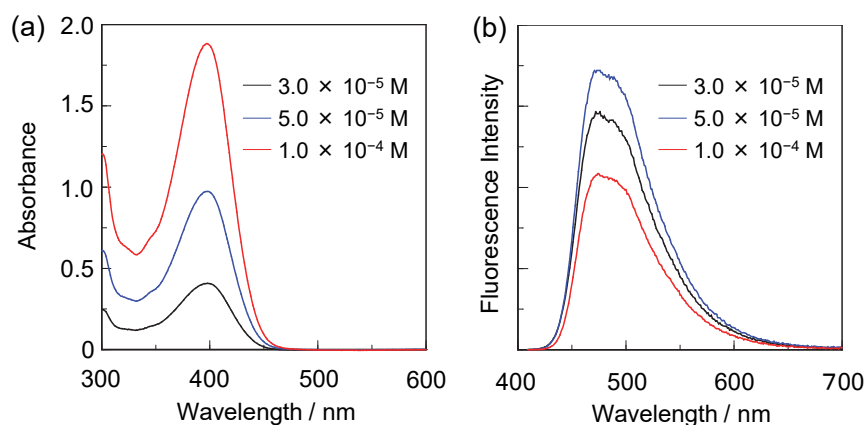

**Fig. S17** (a) Photoabsorption and (b) fluorescence spectra ( $\lambda^{\text{ex}} = 399 \text{ nm}$ ) of **BBT-PhCN2** at various concentrations ( $3.0 \times 10^{-5} \text{ M}$ ,  $5.0 \times 10^{-5} \text{ M}$ , and  $1.0 \times 10^{-4} \text{ M}$ ) in toluene.

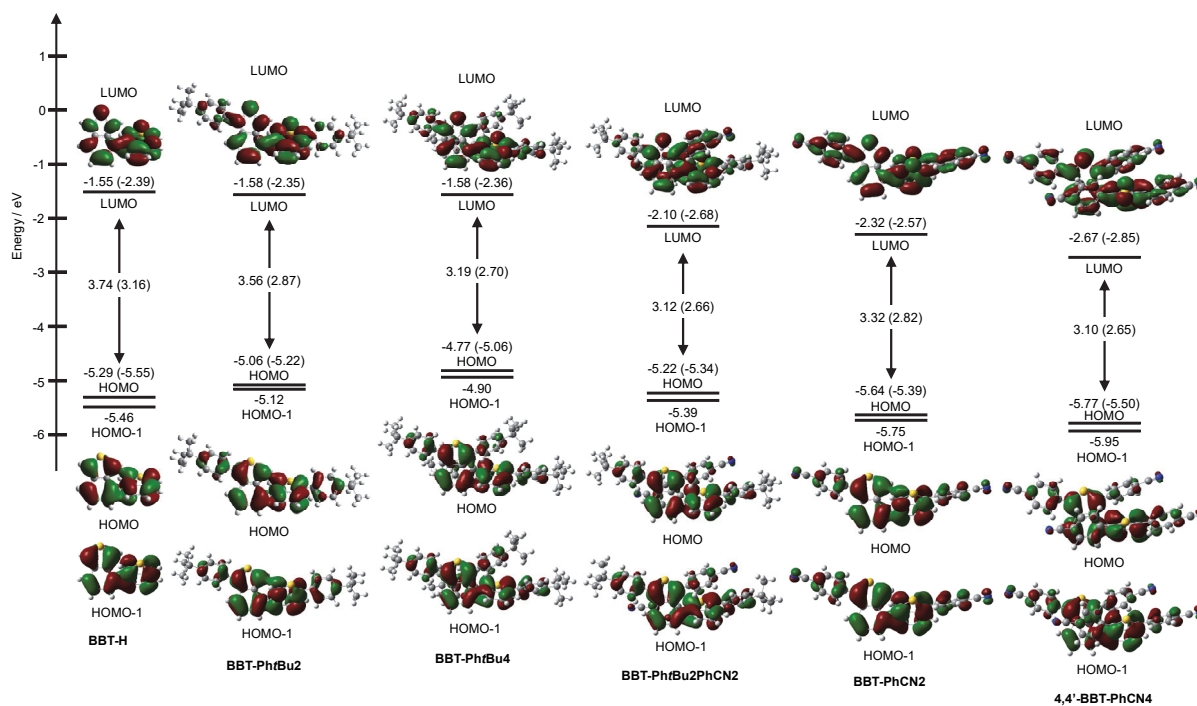

**Fig. S18** Energy level diagram, HOMO, HOMO–1, and LUMO of **BBT-H**, **BBT-PhzBu2**, **BBT-PhzBu2**, **BBT-PhzBu2PhCN2**, **BBT-PhCN2**, and **BBT-PhCN4** derived from DFT calculations at the B3LYP/6-31G(d,p) level. For all the 4,4'-BBT derivatives the optimized geometries are a *syn-clinal* (*sc*) conformation. Numbers in parentheses are the experimental values (Table 1).

**Table S1** Crystal data and structure refinement parameters for **BBT-PhzBu2** (CCDC 2248179) and **BBT-PhzBu4** (CCDC 2337948).

| Compound                                                                              | <b>BBT-PhzBu2</b>                                  | <b>BBT-PhzBu4</b>                                              |
|---------------------------------------------------------------------------------------|----------------------------------------------------|----------------------------------------------------------------|
| Molecular formula                                                                     | C <sub>36</sub> H <sub>34</sub> S <sub>2</sub>     | C <sub>57</sub> H <sub>60</sub> Cl <sub>2</sub> S <sub>2</sub> |
| Formula weight                                                                        | 530.75                                             | 880.07                                                         |
| Number of reflection used for unit cell determination (2 $\theta$ range/ $^{\circ}$ ) | 51532 (3.606-50.7)                                 | 84132 (3.606-50.7)                                             |
| Temperature/K                                                                         | 100                                                | 100                                                            |
| Crystal System                                                                        | monoclinic                                         | triclinic                                                      |
| Space group                                                                           | <i>P2<sub>1</sub>/n</i>                            | <i>P</i> -1                                                    |
| <i>a</i> / $\text{\AA}$                                                               | 10.3004(2)                                         | 14.4868(3)                                                     |
| <i>b</i> / $\text{\AA}$                                                               | 11.6368(3)                                         | 15.5221(5)                                                     |
| <i>c</i> / $\text{\AA}$                                                               | 47.0635(14)                                        | 22.5994(6)                                                     |
| $\alpha$ / $^{\circ}$                                                                 |                                                    | 75.521(2)                                                      |
| $\beta$ / $^{\circ}$                                                                  | 92.625(3)                                          | 80.754(2)                                                      |
| $\gamma$ / $^{\circ}$                                                                 |                                                    | 84.376(2)                                                      |
| <i>V</i> / $\text{\AA}^3$                                                             | 5635.3(3)                                          | 4847.6(2)                                                      |
| <i>Z</i>                                                                              | 8                                                  | 4                                                              |
| <i>D</i> <sub>c</sub> /g cm <sup>-3</sup>                                             | 1.251                                              | 1.206                                                          |
| <i>F</i> (000)                                                                        | 2256                                               | 1872                                                           |
| Radiation                                                                             | Mo-K $\alpha$ ( $\lambda$ = 0.71073 $\text{\AA}$ ) | Mo-K $\alpha$ ( $\lambda$ = 0.71073 $\text{\AA}$ )             |
| Crystal size/mm <sup>3</sup>                                                          | 0.145 $\times$ 0.113 $\times$ 0.024                | 0.2 $\times$ 0.062 $\times$ 0.052                              |
| Range of indices <i>h</i> ; <i>k</i> ; <i>l</i>                                       | -12, 12; -14, 14; -56, 56                          | -19, 19; -20, 20; -29, 29                                      |
| Reflections collected (unique)                                                        | 10317                                              | 23124                                                          |
| Reflection observed with <i>I</i> <sub>0</sub> >2 $\sigma$ <i>I</i> <sub>0</sub>      | 7324                                               | 16714                                                          |
| Number of parameters                                                                  | 697                                                | 1181                                                           |
| Final R indexes [ <i>I</i> <sub>0</sub> >2 $\sigma$ <i>I</i> <sub>0</sub> ]           | R <sub>1</sub> = 0.0664, wR <sub>2</sub> = 0.1488  | R <sub>1</sub> = 0.0623, wR <sub>2</sub> = 0.1496              |
| Final R indexes [all data]                                                            | R <sub>1</sub> = 0.0994, wR <sub>2</sub> = 0.1642  | R <sub>1</sub> = 0.0922, wR <sub>2</sub> = 0.1634              |
| Goodness-of-fit on <i>F</i> <sup>2</sup>                                              | 1.049                                              | 1.015                                                          |
| Max. Shift/Error in final cycle                                                       | 0.00                                               | 0.00                                                           |
| Max. peak in final diff. map/e $\text{\AA}^{-3}$                                      | 0.58                                               | 0.87                                                           |
| Min. peak in final diff. map/e $\text{\AA}^{-3}$                                      | -0.48                                              | -1.33                                                          |

**Table S2** Geometrical coordinates of the optimized **BBT-H** by DFT at the B3LYP/6-31G(d,p) level.<sup>1</sup>

Cartesian coordinates:

| Center Number | Atomic Number | Atomic Type | Coordinates (Angstroms) |           |           |
|---------------|---------------|-------------|-------------------------|-----------|-----------|
|               |               |             | X                       | Y         | Z         |
| 1             | C             | 0           | 3.014613                | 0.092656  | 0.246587  |
| 2             | C             | 0           | 3.469568                | 1.192933  | 1.038642  |
| 3             | C             | 0           | 2.586725                | 2.181467  | 1.372708  |
| 4             | C             | 0           | 1.21901                 | 2.12832   | 0.956653  |
| 5             | C             | 0           | 0.713504                | 1.089175  | 0.210163  |
| 6             | C             | 0           | 1.622641                | 0.033794  | -0.17567  |
| 7             | S             | 0           | 2.781034                | -2.035549 | -1.172737 |
| 8             | C             | 0           | -1.622642               | 0.033794  | 0.17567   |
| 9             | C             | 0           | -0.713504               | 1.089175  | -0.210163 |
| 10            | C             | 0           | -1.21901                | 2.128319  | -0.956655 |
| 11            | C             | 0           | -2.586726               | 2.181466  | -1.372709 |
| 12            | C             | 0           | -3.469569               | 1.192933  | -1.038641 |
| 13            | C             | 0           | -3.014613               | 0.092656  | -0.246585 |
| 14            | S             | 0           | -2.781033               | -2.035551 | 1.172734  |
| 15            | H             | 0           | 4.506637                | 1.23322   | 1.358132  |
| 16            | H             | 0           | 2.916292                | 3.02579   | 1.971013  |
| 17            | H             | 0           | 0.549238                | 2.927872  | 1.258602  |
| 18            | H             | 0           | -0.549238               | 2.927871  | -1.258604 |
| 19            | H             | 0           | -2.916292               | 3.025789  | -1.971014 |
| 20            | H             | 0           | -4.506638               | 1.23322   | -1.35813  |
| 21            | C             | 0           | 3.751548                | -0.981598 | -0.225472 |
| 22            | H             | 0           | 4.800145                | -1.191301 | -0.070182 |
| 23            | C             | 0           | 1.369808                | -1.078593 | -0.963293 |
| 24            | H             | 0           | 0.437756                | -1.375725 | -1.419233 |
| 25            | C             | 0           | -1.369809               | -1.078591 | 0.963295  |
| 26            | H             | 0           | -0.437757               | -1.375723 | 1.419236  |
| 27            | C             | 0           | -3.751549               | -0.981596 | 0.225475  |
| 28            | H             | 0           | -4.800146               | -1.191299 | 0.070187  |

**Table S3** Geometrical coordinates of the optimized **BBT-PhzBu2** by DFT at the B3LYP/6-31G(d,p) level.<sup>1</sup>

Cartesian coordinates:

| Center Number | Atomic Number | Atomic Type | Coordinates (Angstroms) |          |           |
|---------------|---------------|-------------|-------------------------|----------|-----------|
|               |               |             | X                       | Y        | Z         |
| 1             | C             | 0           | 1.620738                | 1.023449 | -0.238209 |

|    |   |   |           |           |           |
|----|---|---|-----------|-----------|-----------|
| 2  | C | 0 | 3.025876  | 1.083365  | 0.133791  |
| 3  | C | 0 | 3.480829  | 2.153026  | 0.966515  |
| 4  | C | 0 | 2.599335  | 3.125970  | 1.351629  |
| 5  | C | 0 | 1.227636  | 3.087165  | 0.953848  |
| 6  | C | 0 | 0.714470  | 2.062505  | 0.193584  |
| 7  | C | 0 | 1.336319  | -0.081327 | -1.024700 |
| 8  | C | 0 | 3.769099  | 0.014305  | -0.378440 |
| 9  | H | 0 | 4.513994  | 2.178448  | 1.294241  |
| 10 | H | 0 | 2.936109  | 3.941171  | 1.985304  |
| 11 | H | 0 | 0.560206  | 3.875452  | 1.288908  |
| 12 | C | 0 | -0.723119 | 2.057954  | -0.192642 |
| 13 | C | 0 | -1.620980 | 1.009232  | 0.233300  |
| 14 | C | 0 | -1.244761 | 3.083294  | -0.946208 |
| 15 | C | 0 | -3.026897 | 1.060861  | -0.136954 |
| 16 | C | 0 | -1.327522 | -0.098276 | 1.012655  |
| 17 | C | 0 | -2.617111 | 3.114170  | -1.342468 |
| 18 | H | 0 | -0.583701 | 3.878787  | -1.276837 |
| 19 | C | 0 | -3.490857 | 2.132239  | -0.962509 |
| 20 | C | 0 | -3.761439 | -0.016958 | 0.369271  |
| 21 | H | 0 | -2.960676 | 3.930748  | -1.970701 |
| 22 | H | 0 | -4.524518 | 2.151998  | -1.289170 |
| 23 | S | 0 | 2.735530  | -1.032475 | -1.302779 |
| 24 | S | 0 | -2.719378 | -1.061424 | 1.286306  |
| 25 | C | 0 | -5.191529 | -0.323611 | 0.241465  |
| 26 | C | 0 | -5.642122 | -1.634856 | 0.021131  |
| 27 | C | 0 | -6.168773 | 0.683249  | 0.357653  |
| 28 | C | 0 | -7.001455 | -1.925985 | -0.083290 |
| 29 | H | 0 | -4.916929 | -2.436052 | -0.089229 |
| 30 | C | 0 | -7.521328 | 0.384853  | 0.239351  |
| 31 | H | 0 | -5.862729 | 1.701833  | 0.572165  |
| 32 | C | 0 | -7.977949 | -0.925731 | 0.015913  |
| 33 | H | 0 | -7.291094 | -2.955810 | -0.257229 |
| 34 | H | 0 | -8.237111 | 1.195472  | 0.340234  |
| 35 | C | 0 | 5.201196  | -0.282539 | -0.250771 |
| 36 | C | 0 | 6.170612  | 0.728347  | -0.353774 |
| 37 | C | 0 | 5.659903  | -1.596599 | -0.041115 |
| 38 | C | 0 | 7.529954  | 0.440675  | -0.233028 |
| 39 | H | 0 | 5.859547  | 1.747053  | -0.560373 |
| 40 | C | 0 | 7.017124  | -1.875039 | 0.064558  |

|    |   |   |            |           |           |
|----|---|---|------------|-----------|-----------|
| 41 | H | 0 | 4.939188   | -2.403175 | 0.058676  |
| 42 | C | 0 | 7.991545   | -0.865298 | -0.021292 |
| 43 | H | 0 | 8.234102   | 1.259752  | -0.323341 |
| 44 | H | 0 | 7.320017   | -2.904717 | 0.230199  |
| 45 | C | 0 | -9.485922  | -1.207807 | -0.103694 |
| 46 | C | 0 | -10.194232 | -0.784326 | 1.205258  |
| 47 | C | 0 | -10.068685 | -0.397330 | -1.285873 |
| 48 | C | 0 | -9.783967  | -2.698677 | -0.350176 |
| 49 | H | 0 | -9.806257  | -1.347436 | 2.060215  |
| 50 | H | 0 | -10.056906 | 0.280065  | 1.417014  |
| 51 | H | 0 | -11.271276 | -0.973248 | 1.133891  |
| 52 | H | 0 | -9.591034  | -0.681927 | -2.229011 |
| 53 | H | 0 | -11.144773 | -0.581379 | -1.380499 |
| 54 | H | 0 | -9.926232  | 0.678901  | -1.151312 |
| 55 | H | 0 | -10.865229 | -2.850065 | -0.429325 |
| 56 | H | 0 | -9.332181  | -3.056357 | -1.281161 |
| 57 | H | 0 | -9.422617  | -3.327826 | 0.469783  |
| 58 | C | 0 | 9.483081   | -1.218948 | 0.113186  |
| 59 | C | 0 | 9.735187   | -1.865939 | 1.496049  |
| 60 | C | 0 | 9.877491   | -2.219551 | -0.999142 |
| 61 | C | 0 | 10.390958  | 0.019082  | -0.010132 |
| 62 | H | 0 | 9.471771   | -1.176559 | 2.304760  |
| 63 | H | 0 | 9.148300   | -2.779060 | 1.631881  |
| 64 | H | 0 | 10.792881  | -2.130630 | 1.605747  |
| 65 | H | 0 | 9.716301   | -1.785638 | -1.991275 |
| 66 | H | 0 | 10.936574  | -2.487300 | -0.912821 |
| 67 | H | 0 | 9.295294   | -3.143808 | -0.940900 |
| 68 | H | 0 | 11.438677  | -0.280433 | 0.094187  |
| 69 | H | 0 | 10.283797  | 0.508253  | -0.983784 |
| 70 | H | 0 | 10.180459  | 0.758259  | 0.769674  |
| 71 | H | 0 | 0.386327   | -0.369831 | -1.448330 |
| 72 | H | 0 | -0.374954  | -0.382235 | 1.433564  |

**Table S4** Geometrical coordinates of the optimized **BBT-PhCN2** by DFT at the B3LYP/6-31G(d,p) level.<sup>1</sup>

Cartesian coordinates:

| Center<br>Number | Atomic<br>Number | Atomic<br>Type | Coordinates (Angstroms) |          |          |
|------------------|------------------|----------------|-------------------------|----------|----------|
|                  |                  |                | X                       | Y        | Z        |
| 1                | C                | 0              | -0.249146               | 1.611493 | 0.866384 |

|    |   |   |           |           |           |
|----|---|---|-----------|-----------|-----------|
| 2  | C | 0 | 0.120699  | 3.016993  | 0.901592  |
| 3  | C | 0 | 0.865542  | 3.510639  | 2.017186  |
| 4  | C | 0 | 1.236605  | 2.647208  | 3.012357  |
| 5  | C | 0 | 0.903384  | 1.260144  | 2.958729  |
| 6  | C | 0 | 0.179881  | 0.721690  | 1.920006  |
| 7  | C | 0 | -0.395896 | 3.738311  | -0.183192 |
| 8  | H | 0 | 1.108075  | 4.564956  | 2.083962  |
| 9  | H | 0 | 1.795246  | 3.017025  | 3.866865  |
| 10 | H | 0 | 1.237068  | 0.607500  | 3.759591  |
| 11 | C | 0 | -0.179881 | -0.721690 | 1.920006  |
| 12 | C | 0 | 0.249146  | -1.611493 | 0.866384  |
| 13 | C | 0 | -0.903384 | -1.260144 | 2.958729  |
| 14 | C | 0 | -0.120699 | -3.016993 | 0.901592  |
| 15 | C | 0 | -1.236605 | -2.647208 | 3.012357  |
| 16 | H | 0 | -1.237068 | -0.607500 | 3.759591  |
| 17 | C | 0 | -0.865542 | -3.510639 | 2.017186  |
| 18 | C | 0 | 0.395896  | -3.738311 | -0.183192 |
| 19 | H | 0 | -1.795246 | -3.017025 | 3.866865  |
| 20 | H | 0 | -1.108075 | -4.564956 | 2.083962  |
| 21 | C | 0 | -0.236755 | 5.152114  | -0.530686 |
| 22 | C | 0 | -1.304628 | 5.890395  | -1.080503 |
| 23 | C | 0 | 0.997236  | 5.809469  | -0.347514 |
| 24 | C | 0 | -1.153412 | 7.225749  | -1.426795 |
| 25 | H | 0 | -2.269605 | 5.412318  | -1.215891 |
| 26 | C | 0 | 1.153170  | 7.148693  | -0.679028 |
| 27 | H | 0 | 1.847973  | 5.252397  | 0.027988  |
| 28 | C | 0 | 0.077847  | 7.871746  | -1.222424 |
| 29 | H | 0 | -1.987123 | 7.780460  | -1.843623 |
| 30 | H | 0 | 2.110349  | 7.638774  | -0.536387 |
| 31 | C | 0 | 0.236755  | -5.152114 | -0.530686 |
| 32 | C | 0 | 1.304628  | -5.890395 | -1.080503 |
| 33 | C | 0 | -0.997236 | -5.809469 | -0.347514 |
| 34 | C | 0 | 1.153412  | -7.225749 | -1.426795 |
| 35 | H | 0 | 2.269605  | -5.412318 | -1.215891 |
| 36 | C | 0 | -1.153170 | -7.148693 | -0.679028 |
| 37 | H | 0 | -1.847973 | -5.252397 | 0.027988  |
| 38 | C | 0 | -0.077847 | -7.871746 | -1.222424 |
| 39 | H | 0 | 1.987123  | -7.780460 | -1.843623 |
| 40 | H | 0 | -2.110349 | -7.638774 | -0.536387 |

|    |   |   |           |            |           |
|----|---|---|-----------|------------|-----------|
| 41 | C | 0 | -0.236755 | -9.252526  | -1.568717 |
| 42 | N | 0 | -0.366177 | -10.374434 | -1.849540 |
| 43 | C | 0 | 0.236755  | 9.252526   | -1.568717 |
| 44 | N | 0 | 0.366177  | 10.374434  | -1.849540 |
| 45 | S | 0 | -1.338062 | 2.688549   | -1.198553 |
| 46 | S | 0 | 1.338062  | -2.688549  | -1.198553 |
| 47 | C | 0 | 1.050890  | -1.310846  | -0.224295 |
| 48 | C | 0 | -1.050890 | 1.310846   | -0.224295 |
| 49 | H | 0 | -1.470469 | 0.354420   | -0.497486 |
| 50 | H | 0 | 1.470469  | -0.354420  | -0.497486 |

**Table S5** Geometrical coordinates of the optimized **BBT-PhzBu4** by DFT at the B3LYP/6-31G(d,p) level.<sup>1</sup>

Cartesian coordinates:

| Center<br>Number | Atomic<br>Number | Atomic<br>Type | Coordinates (Angstroms) |           |           |
|------------------|------------------|----------------|-------------------------|-----------|-----------|
|                  |                  |                | X                       | Y         | Z         |
| 1                | C                | 0              | 1.592273                | -0.590026 | 1.476862  |
| 2                | C                | 0              | 3.035406                | -0.384420 | 1.566947  |
| 3                | C                | 0              | 3.592213                | 0.316216  | 2.680315  |
| 4                | C                | 0              | 2.763358                | 0.832492  | 3.635656  |
| 5                | C                | 0              | 1.349921                | 0.710615  | 3.510727  |
| 6                | C                | 0              | 0.744807                | 0.046072  | 2.465714  |
| 7                | C                | 0              | 1.245417                | -1.406157 | 0.392606  |
| 8                | C                | 0              | 3.753410                | -0.996249 | 0.534490  |
| 9                | H                | 0              | 4.668591                | 0.405387  | 2.770665  |
| 10               | H                | 0              | 3.175119                | 1.352954  | 4.495365  |
| 11               | H                | 0              | 0.715873                | 1.178175  | 4.258200  |
| 12               | C                | 0              | -0.747129               | -0.012962 | 2.465017  |
| 13               | C                | 0              | -1.593438               | 0.618414  | 1.472198  |
| 14               | C                | 0              | -1.353441               | -0.672478 | 3.512532  |
| 15               | C                | 0              | -3.036693               | 0.413373  | 1.561663  |
| 16               | C                | 0              | -1.245349               | 1.429262  | 0.384365  |
| 17               | C                | 0              | -2.767016               | -0.793701 | 3.636482  |
| 18               | H                | 0              | -0.720256               | -1.136454 | 4.262962  |
| 19               | C                | 0              | -3.594798               | -0.281817 | 2.677831  |
| 20               | C                | 0              | -3.753442               | 1.020312  | 0.525471  |
| 21               | H                | 0              | -3.179747               | -1.310040 | 4.498208  |
| 22               | H                | 0              | -4.671278               | -0.370282 | 2.767859  |
| 23               | S                | 0              | 2.665217                | -1.843059 | -0.506021 |

|    |   |   |            |           |           |
|----|---|---|------------|-----------|-----------|
| 24 | S | 0 | -2.664068  | 1.861551  | -0.518125 |
| 25 | C | 0 | -5.196601  | 1.031188  | 0.256638  |
| 26 | C | 0 | -5.841847  | 2.184844  | -0.218381 |
| 27 | C | 0 | -5.989162  | -0.118707 | 0.438540  |
| 28 | C | 0 | -7.208061  | 2.190841  | -0.494919 |
| 29 | H | 0 | -5.269231  | 3.097555  | -0.355775 |
| 30 | C | 0 | -7.353589  | -0.099347 | 0.171785  |
| 31 | H | 0 | -5.522772  | -1.041763 | 0.764592  |
| 32 | C | 0 | -8.003526  | 1.053119  | -0.302672 |
| 33 | H | 0 | -7.651296  | 3.111722  | -0.855887 |
| 34 | H | 0 | -7.919541  | -1.013685 | 0.324848  |
| 35 | C | 0 | 5.196900   | -1.008261 | 0.267667  |
| 36 | C | 0 | 5.989549   | 0.137971  | 0.444779  |
| 37 | C | 0 | 5.842246   | -2.168625 | -0.201468 |
| 38 | C | 0 | 7.359429   | 0.118880  | 0.182214  |
| 39 | H | 0 | 5.524298   | 1.063782  | 0.764666  |
| 40 | C | 0 | 7.205016   | -2.174309 | -0.472091 |
| 41 | H | 0 | 5.267966   | -3.080705 | -0.335884 |
| 42 | C | 0 | 8.005475   | -1.034045 | -0.283087 |
| 43 | H | 0 | 7.919721   | 1.034250  | 0.334365  |
| 44 | H | 0 | 7.655003   | -3.096586 | -0.827700 |
| 45 | C | 0 | -9.515151  | 1.025215  | -0.588674 |
| 46 | C | 0 | -9.815789  | -0.044569 | -1.665506 |
| 47 | C | 0 | -10.278185 | 0.671785  | 0.710115  |
| 48 | C | 0 | -10.038479 | 2.380710  | -1.099646 |
| 49 | H | 0 | -9.293510  | 0.183524  | -2.600285 |
| 50 | H | 0 | -9.505440  | -1.043476 | -1.345302 |
| 51 | H | 0 | -10.890493 | -0.081542 | -1.876488 |
| 52 | H | 0 | -10.090328 | 1.417155  | 1.489710  |
| 53 | H | 0 | -11.357331 | 0.640707  | 0.522072  |
| 54 | H | 0 | -9.981035  | -0.304620 | 1.103805  |
| 55 | H | 0 | -11.114560 | 2.312773  | -1.288901 |
| 56 | H | 0 | -9.882504  | 3.180112  | -0.367950 |
| 57 | H | 0 | -9.557089  | 2.676281  | -2.037543 |
| 58 | C | 0 | 9.513059   | -1.090525 | -0.585486 |
| 59 | C | 0 | 10.177158  | -2.162534 | 0.311293  |
| 60 | C | 0 | 9.727177   | -1.463458 | -2.071811 |
| 61 | C | 0 | 10.212912  | 0.256065  | -0.322654 |
| 62 | H | 0 | 10.048636  | -1.920544 | 1.371274  |



|     |   |   |           |           |           |
|-----|---|---|-----------|-----------|-----------|
| 63  | H | 0 | 9.750996  | -3.155711 | 0.142129  |
| 64  | H | 0 | 11.251525 | -2.221220 | 0.103510  |
| 65  | H | 0 | 9.273650  | -0.717041 | -2.731982 |
| 66  | H | 0 | 10.797437 | -1.515288 | -2.301450 |
| 67  | H | 0 | 9.287668  | -2.435066 | -2.315612 |
| 68  | H | 0 | 11.280114 | 0.167403  | -0.549795 |
| 69  | H | 0 | 9.807636  | 1.055716  | -0.951235 |
| 70  | H | 0 | 10.123430 | 0.564599  | 0.724043  |
| 71  | C | 0 | 0.019581  | 2.038287  | -0.072895 |
| 72  | C | 0 | 0.805166  | 2.833536  | 0.779433  |
| 73  | C | 0 | 0.410985  | 1.950634  | -1.417180 |
| 74  | C | 0 | 1.925542  | 3.502231  | 0.299663  |
| 75  | H | 0 | 0.519528  | 2.941903  | 1.819344  |
| 76  | C | 0 | 1.531693  | 2.632233  | -1.892304 |
| 77  | H | 0 | -0.170822 | 1.338900  | -2.100218 |
| 78  | C | 0 | 2.314317  | 3.431634  | -1.049941 |
| 79  | H | 0 | 2.495316  | 4.112310  | 0.994385  |
| 80  | H | 0 | 1.785524  | 2.530752  | -2.941058 |
| 81  | C | 0 | 3.530590  | 4.233484  | -1.547070 |
| 82  | C | 0 | 4.795226  | 3.805316  | -0.766938 |
| 83  | C | 0 | 3.799576  | 4.018107  | -3.048340 |
| 84  | C | 0 | 3.274134  | 5.741977  | -1.314575 |
| 85  | H | 0 | 4.679865  | 3.958420  | 0.310309  |
| 86  | H | 0 | 5.017986  | 2.747135  | -0.935130 |
| 87  | H | 0 | 5.661473  | 4.391143  | -1.095166 |
| 88  | H | 0 | 2.954344  | 4.341420  | -3.664557 |
| 89  | H | 0 | 4.672633  | 4.603690  | -3.354094 |
| 90  | H | 0 | 4.009372  | 2.968326  | -3.277615 |
| 91  | H | 0 | 4.129658  | 6.332514  | -1.661697 |
| 92  | H | 0 | 2.386037  | 6.076502  | -1.860479 |
| 93  | H | 0 | 3.119679  | 5.969500  | -0.255777 |
| 94  | C | 0 | -0.018872 | -2.017513 | -0.063291 |
| 95  | C | 0 | -0.805310 | -2.808975 | 0.791766  |
| 96  | C | 0 | -0.408625 | -1.936273 | -1.408468 |
| 97  | C | 0 | -1.924789 | -3.480389 | 0.313669  |
| 98  | H | 0 | -0.521023 | -2.912328 | 1.832560  |
| 99  | C | 0 | -1.528459 | -2.620521 | -1.881836 |
| 100 | H | 0 | 0.173817  | -1.327513 | -2.093619 |
| 101 | C | 0 | -2.311789 | -3.416381 | -1.036777 |

|     |   |   |           |           |           |
|-----|---|---|-----------|-----------|-----------|
| 102 | H | 0 | -2.495192 | -4.087457 | 1.010518  |
| 103 | H | 0 | -1.780975 | -2.524039 | -2.931379 |
| 104 | C | 0 | -3.526895 | -4.221301 | -1.531788 |
| 105 | C | 0 | -4.792811 | -3.790591 | -0.755130 |
| 106 | C | 0 | -3.794206 | -4.012827 | -3.034332 |
| 107 | C | 0 | -3.269669 | -5.728548 | -1.292241 |
| 108 | H | 0 | -4.678549 | -3.938564 | 0.322962  |
| 109 | H | 0 | -5.016327 | -2.733425 | -0.928607 |
| 110 | H | 0 | -5.658146 | -4.378707 | -1.081670 |
| 111 | H | 0 | -2.947962 | -4.338262 | -3.648034 |
| 112 | H | 0 | -4.666458 | -4.600397 | -3.338556 |
| 113 | H | 0 | -4.004508 | -2.964242 | -3.268556 |
| 114 | H | 0 | -4.124385 | -6.321211 | -1.637720 |
| 115 | H | 0 | -2.380721 | -6.064892 | -1.835638 |
| 116 | H | 0 | -3.116266 | -5.951251 | -0.232267 |

**Table S6** Geometrical coordinates of the optimized **BBT-PhCN4** by DFT at the B3LYP/6-31G(d,p) level.<sup>1</sup>

Cartesian coordinates:

| Center Number | Atomic Number | Atomic Type | Coordinates (Angstroms) |           |          |
|---------------|---------------|-------------|-------------------------|-----------|----------|
|               |               |             | X                       | Y         | Z        |
| 1             | C             | 0           | -1.539639               | -0.631102 | 1.240043 |
| 2             | C             | 0           | -2.978142               | -0.404041 | 1.232793 |
| 3             | C             | 0           | -3.600745               | 0.272017  | 2.326401 |
| 4             | C             | 0           | -2.829957               | 0.736247  | 3.355977 |
| 5             | C             | 0           | -1.410399               | 0.621165  | 3.310939 |
| 6             | C             | 0           | -0.745687               | -0.002579 | 2.277711 |
| 7             | C             | 0           | -3.624360               | -0.977256 | 0.132215 |
| 8             | H             | 0           | -4.678951               | 0.383654  | 2.343458 |
| 9             | H             | 0           | -3.292759               | 1.229505  | 4.205180 |
| 10            | H             | 0           | -0.822506               | 1.082759  | 4.098989 |
| 11            | C             | 0           | 0.745633                | 0.002636  | 2.277721 |
| 12            | C             | 0           | 1.539606                | 0.631141  | 1.240057 |
| 13            | C             | 0           | 1.410324                | -0.621121 | 3.310956 |
| 14            | C             | 0           | 2.978103                | 0.404038  | 1.232815 |
| 15            | C             | 0           | 2.829879                | -0.736230 | 3.356007 |
| 16            | H             | 0           | 0.822415                | -1.082706 | 4.098998 |
| 17            | C             | 0           | 3.600684                | -0.272025 | 2.326433 |
| 18            | C             | 0           | 3.624342                | 0.977217  | 0.132231 |

|    |   |   |            |           |           |
|----|---|---|------------|-----------|-----------|
| 19 | H | 0 | 3.292663   | -1.229497 | 4.205215  |
| 20 | H | 0 | 4.678887   | -0.383690 | 2.343495  |
| 21 | C | 0 | -5.040386  | -0.927981 | -0.250784 |
| 22 | C | 0 | -5.699649  | -2.073840 | -0.737528 |
| 23 | C | 0 | -5.765080  | 0.278005  | -0.173546 |
| 24 | C | 0 | -7.032314  | -2.023425 | -1.123244 |
| 25 | H | 0 | -5.163850  | -3.016223 | -0.792330 |
| 26 | C | 0 | -7.100490  | 0.335559  | -0.551812 |
| 27 | H | 0 | -5.267126  | 1.185007  | 0.149432  |
| 28 | C | 0 | -7.747078  | -0.817184 | -1.028125 |
| 29 | H | 0 | -7.530628  | -2.914605 | -1.489142 |
| 30 | H | 0 | -7.640153  | 1.274879  | -0.500572 |
| 31 | C | 0 | 5.040366   | 0.927883  | -0.250772 |
| 32 | C | 0 | 5.699675   | 2.073711  | -0.737523 |
| 33 | C | 0 | 5.765007   | -0.278135 | -0.173534 |
| 34 | C | 0 | 7.032336   | 2.023237  | -1.123246 |
| 35 | H | 0 | 5.163916   | 3.016117  | -0.792325 |
| 36 | C | 0 | 7.100412   | -0.335749 | -0.551810 |
| 37 | H | 0 | 5.267015   | -1.185115 | 0.149450  |
| 38 | C | 0 | 7.747047   | 0.816965  | -1.028129 |
| 39 | H | 0 | 7.530686   | 2.914393  | -1.489149 |
| 40 | H | 0 | 7.640032   | -1.275095 | -0.500574 |
| 41 | C | 0 | 9.124771   | 0.765156  | -1.419242 |
| 42 | N | 0 | 10.243932  | 0.728527  | -1.735237 |
| 43 | C | 0 | -9.124807  | -0.765437 | -1.419227 |
| 44 | N | 0 | -10.243972 | -0.728858 | -1.735215 |
| 45 | S | 0 | -2.483173  | -1.834044 | -0.841907 |
| 46 | S | 0 | 2.483187   | 1.834039  | -0.841898 |
| 47 | C | 0 | 1.131691   | 1.440701  | 0.171327  |
| 48 | C | 0 | -1.131694  | -1.440658 | 0.171323  |
| 49 | C | 0 | -0.170174  | 2.044934  | -0.161084 |
| 50 | C | 0 | -0.710766  | 1.934172  | -1.455509 |
| 51 | C | 0 | -0.876361  | 2.794901  | 0.797253  |
| 52 | C | 0 | -1.936773  | 2.506905  | -1.772283 |
| 53 | H | 0 | -0.173282  | 1.370454  | -2.211104 |
| 54 | C | 0 | -2.105132  | 3.365117  | 0.493812  |
| 55 | H | 0 | -0.451318  | 2.928997  | 1.784296  |
| 56 | C | 0 | -2.651941  | 3.214180  | -0.792035 |
| 58 | H | 0 | -2.646019  | 3.931164  | 1.244194  |

|    |   |   |           |           |           |
|----|---|---|-----------|-----------|-----------|
| 59 | C | 0 | 0.170196  | -2.044846 | -0.161077 |
| 60 | C | 0 | 0.710788  | -1.934083 | -1.455501 |
| 61 | C | 0 | 0.876416  | -2.794755 | 0.797280  |
| 62 | C | 0 | 1.936823  | -2.506765 | -1.772258 |
| 63 | H | 0 | 0.173278  | -1.370407 | -2.211109 |
| 64 | C | 0 | 2.105216  | -3.364918 | 0.493857  |
| 65 | H | 0 | 0.451379  | -2.928844 | 1.784327  |
| 66 | C | 0 | 2.652022  | -3.213983 | -0.791991 |
| 67 | H | 0 | 2.353327  | -2.397076 | -2.767635 |
| 68 | H | 0 | 2.646130  | -3.930918 | 1.244255  |
| 69 | C | 0 | 3.945032  | -3.756578 | -1.087497 |
| 70 | N | 0 | 5.008344  | -4.174920 | -1.309005 |
| 71 | C | 0 | -3.944918 | 3.756842  | -1.087562 |
| 72 | N | 0 | -5.008207 | 4.175235  | -1.309085 |

**Table S7** Geometrical coordinates of the optimized **BBT-PhzBu2PhCN2** by DFT at the B3LYP/6-31G(d,p) level.<sup>1</sup>

Cartesian coordinates:

| Center Number | Atomic Number | Atomic Type | Coordinates (Angstroms) |           |          |
|---------------|---------------|-------------|-------------------------|-----------|----------|
|               |               |             | X                       | Y         | Z        |
| 1             | C             | 0           | 1.550349                | -0.563683 | 1.416319 |
| 2             | C             | 0           | 2.983587                | -0.303729 | 1.408122 |
| 3             | C             | 0           | 3.592276                | 0.392006  | 2.497156 |
| 4             | C             | 0           | 2.813148                | 0.845869  | 3.524958 |
| 5             | C             | 0           | 1.396289                | 0.698888  | 3.480319 |
| 6             | C             | 0           | 0.744397                | 0.053836  | 2.451623 |
| 7             | C             | 0           | 1.160528                | -1.384754 | 0.350053 |
| 8             | C             | 0           | 3.645714                | -0.861971 | 0.310228 |
| 9             | H             | 0           | 4.667761                | 0.528667  | 2.506683 |
| 10            | H             | 0           | 3.264917                | 1.355738  | 4.370473 |
| 11            | H             | 0           | 0.797570                | 1.153769  | 4.264362 |
| 12            | C             | 0           | -0.746325               | 0.029251  | 2.451237 |
| 13            | C             | 0           | -1.551694               | 0.622697  | 1.401510 |
| 14            | C             | 0           | -1.398796               | -0.593116 | 3.493504 |
| 15            | C             | 0           | -2.984586               | 0.360810  | 1.397692 |
| 16            | C             | 0           | -1.161916               | 1.420103  | 0.317343 |
| 17            | C             | 0           | -2.815500               | -0.741251 | 3.539646 |
| 18            | H             | 0           | -0.800465               | -1.029609 | 4.288222 |
| 19            | C             | 0           | -3.593860               | -0.311714 | 2.500871 |

|    |   |   |            |           |           |
|----|---|---|------------|-----------|-----------|
| 20 | C | 0 | -3.646386  | 0.893890  | 0.287354  |
| 21 | H | 0 | -3.267568  | -1.232957 | 4.395693  |
| 22 | H | 0 | -4.669175  | -0.450037 | 2.511732  |
| 23 | S | 0 | 2.524439   | -1.741172 | -0.665772 |
| 24 | S | 0 | -2.525642  | 1.752331  | -0.707057 |
| 25 | C | 0 | -5.062649  | 0.798742  | -0.091605 |
| 26 | C | 0 | -5.770922  | 1.913168  | -0.566769 |
| 27 | C | 0 | -5.748831  | -0.428382 | -0.022963 |
| 28 | C | 0 | -7.107553  | 1.808025  | -0.948880 |
| 29 | H | 0 | -5.275665  | 2.878573  | -0.619809 |
| 30 | C | 0 | -7.083035  | -0.521133 | -0.401108 |
| 31 | H | 0 | -5.221871  | -1.321700 | 0.295231  |
| 32 | C | 0 | -7.800596  | 0.591927  | -0.873123 |
| 33 | H | 0 | -7.609646  | 2.700752  | -1.303041 |
| 34 | H | 0 | -7.564625  | -1.492375 | -0.343511 |
| 35 | C | 0 | 5.062465   | -0.778538 | -0.068986 |
| 36 | C | 0 | 5.755306   | 0.441617  | -0.017547 |
| 37 | C | 0 | 5.765700   | -1.907331 | -0.528300 |
| 38 | C | 0 | 7.095513   | 0.524511  | -0.393590 |
| 39 | H | 0 | 5.233661   | 1.343346  | 0.285396  |
| 40 | C | 0 | 7.099140   | -1.812358 | -0.907493 |
| 41 | H | 0 | 5.264132   | -2.870067 | -0.568394 |
| 42 | C | 0 | 7.803467   | -0.596711 | -0.847048 |
| 43 | H | 0 | 7.577070   | 1.493909  | -0.345246 |
| 44 | H | 0 | 7.602670   | -2.711348 | -1.250138 |
| 45 | C | 0 | -9.274858  | 0.438482  | -1.285921 |
| 46 | C | 0 | -9.379145  | -0.584342 | -2.442527 |
| 47 | C | 0 | -10.096594 | -0.069834 | -0.077366 |
| 48 | C | 0 | -9.890609  | 1.767806  | -1.761096 |
| 49 | H | 0 | -8.812758  | -0.246424 | -3.316367 |
| 50 | H | 0 | -8.993655  | -1.566590 | -2.154937 |
| 51 | H | 0 | -10.424959 | -0.711518 | -2.743706 |
| 52 | H | 0 | -10.046753 | 0.638049  | 0.756461  |
| 53 | H | 0 | -11.148832 | -0.191174 | -0.357661 |
| 54 | H | 0 | -9.735471  | -1.037295 | 0.283133  |
| 55 | H | 0 | -10.937172 | 1.609491  | -2.039886 |
| 56 | H | 0 | -9.870652  | 2.530737  | -0.975900 |
| 57 | H | 0 | -9.373164  | 2.166385  | -2.639834 |
| 58 | C | 0 | 9.280640   | -0.539584 | -1.273941 |

|    |   |   |           |           |           |
|----|---|---|-----------|-----------|-----------|
| 59 | C | 0 | 10.108269 | -1.502075 | -0.388983 |
| 60 | C | 0 | 9.404484  | -0.971308 | -2.754666 |
| 61 | C | 0 | 9.874974  | 0.874343  | -1.133479 |
| 62 | H | 0 | 10.044687 | -1.216716 | 0.666096  |
| 63 | H | 0 | 9.762930  | -2.536420 | -0.476559 |
| 64 | H | 0 | 11.163035 | -1.477468 | -0.684562 |
| 65 | H | 0 | 8.832949  | -0.302785 | -3.406456 |
| 66 | H | 0 | 10.452629 | -0.941778 | -3.072587 |
| 67 | H | 0 | 9.037181  | -1.989240 | -2.915093 |
| 68 | H | 0 | 10.924368 | 0.864670  | -1.444715 |
| 69 | H | 0 | 9.351605  | 1.601937  | -1.761916 |
| 70 | H | 0 | 9.841761  | 1.229702  | -0.098448 |
| 71 | C | 0 | 0.117437  | 2.063543  | -0.022689 |
| 72 | C | 0 | 0.811792  | 2.832687  | 0.930026  |
| 73 | C | 0 | 0.646423  | 1.979946  | -1.324714 |
| 74 | C | 0 | 2.011897  | 3.453382  | 0.611888  |
| 75 | H | 0 | 0.397479  | 2.944000  | 1.924293  |
| 76 | C | 0 | 1.842326  | 2.604487  | -1.656657 |
| 77 | H | 0 | 0.121820  | 1.397634  | -2.075285 |
| 78 | H | 0 | 2.541049  | 4.035573  | 1.358389  |
| 79 | H | 0 | 2.247464  | 2.516869  | -2.658953 |
| 80 | C | 0 | -0.119186 | -2.035084 | 0.024704  |
| 81 | C | 0 | -0.812453 | -2.783610 | 0.994485  |
| 82 | C | 0 | -0.649772 | -1.979006 | -1.278108 |
| 83 | C | 0 | -2.013381 | -3.410137 | 0.691366  |
| 84 | H | 0 | -0.396779 | -2.873938 | 1.990314  |
| 85 | C | 0 | -1.846635 | -2.609582 | -1.594953 |
| 86 | H | 0 | -0.125938 | -1.412964 | -2.041545 |
| 87 | C | 0 | -2.546242 | -3.321100 | -0.606287 |
| 88 | H | 0 | -2.541848 | -3.975918 | 1.450855  |
| 89 | H | 0 | -2.253267 | -2.542881 | -2.598254 |
| 90 | C | 0 | 3.797183  | 3.951924  | -1.003813 |
| 91 | N | 0 | 4.824619  | 4.439869  | -1.251530 |
| 92 | C | 0 | 2.542834  | 3.337439  | -0.684428 |
| 93 | C | 0 | -3.802367 | -3.939883 | -0.909928 |
| 94 | N | 0 | -4.831859 | -4.430174 | -1.144168 |

Ref. 1 M. J. Frisch , G. W. Trucks , H. B. Schlegel , G. E. Scuseria , M. A. Robb , J. R. Cheeseman , G. Scalmani , V. Barone , G. A. Petersson , H. Nakatsuji , X. Li , M. Caricato , A. V. Marenich , J. Bloino , B. G. Janesko , R. Gomperts , B. Mennucci , H. P. Hratchian , J. V. Ortiz , A. F. Izmaylov , J. L. Sonnenberg , D. Williams-Young , F. Ding , F. Lipparini , F. Egidi , J. Goings , B. Peng , A. Petrone , T. Henderson , D. Ranasinghe , V. G. Zakrzewski , J. Gao , N. Rega , G. Zheng , W. Liang , M. Hada , M. Ehara , K. Toyota , R. Fukuda , J. Hasegawa , M. Ishida , T. Nakajima , Y. Honda , O. Kitao , H. Nakai , T. Vreven , K. Throssell , J. A. Montgomery, Jr. , J. E. Peralta , F. Ogliaro , M. J. Bearpark , J. J. Heyd , E. N. Brothers , K. N. Kudin , V. N. Staroverov , T. A. Keith , R. Kobayashi , J. Normand , K. Raghavachari , A. P. Rendell , J. C. Burant , S. S. Iyengar , J. Tomasi , M. Cossi , J. M. Millam , M. Klene , C. Adamo , R. Cammi , J. W. Ochterski , R. L. Martin , K. Morokuma , O. Farkas , J. B. Foresman and D. J. Fox , *Gaussian 16, Revision B.01* , Gaussian, Inc., Wallingford CT, 2016.
